# Supplementary material for: Association between the Oxidative Balance Score and testosterone levels in males from the National Health and Nutrition Examination Survey 2013-2016
Source: Research Square preprint supplement (doi:10.21203/rs.3.rs-5862685/v1), 2025-02-03
Supplement: Supplementary file 1 [file d1477f704912f045c22b5572.docx]

**Association between the Oxidative Balance Score and testosterone levels in males from the National Health and Nutrition Examination Survey 2013-2016**

Yinchun Lv1✝, Dongsheng Zhang2✝, Siying Li1, Yutong Nie1, Xue Li1, Qiaorong Huang1, Ran Lu1,3, Junman Ye1, Wentong Meng1, Xiaolong Chen4*, Xianming Mo1*.

1Department of Urology, Laboratory of Stem Cell Biology, Frontiers Science Center for Disease-related Molecular Network, West China Hospital, Sichuan University, Chengdu, Sichuan, China.

2 Department of Urology, The Second Affiliated Hospital of Chongqing Medical University, Chongqing Medical University, Chongqing 400010, China

3 Department of Urology and Pelvic Surgery, West China-PUMC C.C. Chen Institute of Health, West China School of Public Health and West China Fourth Hospital, Sichuan University

4 Department of General Surgery, Gastric Cancer Center, Laboratory of Stem Cell Biology, West China Hospital, Sichuan University, Chengdu, China.

✝These authors contributed equally.

*Correspondence: Xiaolong Chen: 626290977@qq.com

Xianming Mo: [xmingmo@scu.edu.cn](mailto:xmingmo@scu.edu.cn)

**Supplementary Table 1**
Components of the oxidative balance score

| OBS components | Property | 0 | 1 | 2 |
| --- | --- | --- | --- | --- |
| Dietary OBS components |  |  |  |  |
| Dietary fiber (g/d) | A | <13.25 | 13.25-20.8 | ≥20.8 |
| Carotene (RE/d) | A | <214.48 | 214.48-527.56 | ≥527.56 |
| Niacin (mg/d) | A | <23.5 | 23.5-33.24 | ≥33.24 |
| Vitamin B6 (mg/d) | A | <1.78 | 1.78-2.65 | ≥2.65 |
| Total folate (mcg/d) | A | <321 | 321-492 | ≥492 |
| Vitamin B12 (mcg/d) | A | <3.6 | 3.6-6.22 | ≥6.22 |
| Vitamin C (mg/d) | A | <35.7 | 35.7-91.5 | ≥91.5 |
| Vitamin E (ATE) (mg/d) | A | <6.5 | 6.5-10.21 | ≥10.21 |
| Calcium (mg/d) | A | <783.5 | 783.5-1202.5 | ≥1202.5 |
| Magnesium (mg/d) | A | <258.5 | 258.5-367.5 | ≥367.5 |
| Zinc (mg/d) | A | <9.79 | 9.79-14.45 | ≥14.45 |
| Copper (mg/d) | A | <1 | 1-1.43 | ≥1.43 |
| Selenium (mcg/d) | A | <103.65 | 103.65-147.55 | ≥147.55 |
| Iron (mg/d) | P | ≥17.79 | 12.28-17.79 | <12.28 |
| Total fat (mg/d) | P | ≥103.83 | 70.44-103.83 | <70.44 |
| Riboflavin (mg/d) | A | <1.84 | 1.84-2.7 | ≥2.7 |
| Lifestyle OBS components |  |  |  |  |
| Physical activity (MET-minute/week) | A | <960 | 960-4320 | ≥4320 |
| Body mass index (kg/m2) | P | ≥30 | 25.4-30 | <25.4 |
| Cotinine (ng/mL) | P | ≥0.39 | 0.01-0.39 | <0.01 |
| Alcohol (g/d) | P | ≥30 | 0-30 | None |

OBS, oxidative balance score; A, antioxidant; P, prooxidant; RE, retinol equivalent; ATE, alpha-tocopherol equivalent; MET, metabolic equivalent.

**Supplementary Table 2**
Subgroup analysis for the association between OBS and TT.

|  | TT(β(95%CI)P.value) | p for interaction |
| --- | --- | --- |
| race |  | 0.241 |
| Mexican American | 0.010(0.003,0.017)0.011 |  |
| Other Hispanic | 0.001(-0.006,0.008)0.767 |  |
| Non-Hispanic White | 0.005(0.001,0.009)0.020 |  |
| Non-Hispanic Black | 0.006(0.001,0.011)0.031 |  |
| Other | 0.006(-0.002,0.014)0.178 |  |
| education level |  | 0.574 |
| <Highschool | 0.004(-0.002,0.01)0.187 |  |
| Highschool | 0.008(0.000,0.016)0.057 |  |
| >Highschool | 0.004(0.000,0.008)0.034 |  |
| PIR |  | 0.817 |
| ＜1.3 | 0.006(0.002,0.01)0.014 |  |
| （1.3-3.5） | 0.005(-0.001,0.011)0.114 |  |
| ≥3.5 | 0.004(-0.001,0.009)0.103 |  |
| age |  | 0.534 |
| ＜40 | 0.006(0.001,0.011)0.039 |  |
| ≥40 | 0.004(0.001,0.007)0.019 |  |
| diabetes |  | 0.379 |
| NO | 0.006(0.002,0.01)0.007 |  |
| YES | 0.002(-0.003,0.007)0.557 |  |
| hypertension |  | 0.304 |
| NO | 0.006(0.002,0.01)0.004 |  |
| YES | 0.003(-0.002,0.008)0.274 |  |
| eGFR |  | 0.399 |
| >90 | 0.006(0.002,0.01)0.017 |  |
| (60-90) | 0.002(-0.002,0.006)0.386 |  |
| ≤60 | 0.010(0.002,0.018)0.026 |  |
| CVD |  | 0.076 |
| NO | 0.004(0.001,0.007)0.027 |  |
| YES | 0.017(0.008,0.026)0.002 |  |

CVD, cardiovascular diseases; TT,total testosterone;OBS,oxidative balance score; PIR, poverty–income ratio

All analyses were adjusted for race, education, PIR, diabetes, hypertension, eGFR, and CVD, except for classification variables.

**Supplementary Table 3**
Sensitivity analyses to evaluate the impact of individual OBS components on the OBS

| components | TT(β(95% CI)) | FT(β(95% CI)) | BAT(β(95%CI)) |
| --- | --- | --- | --- |
| OBS excluding Total fat | 0.005(0.002,0.008) * | 0.005(0.002,0.008) * | 0.005(0.002,0.008) * |
| OBS excluding physical activity | 0.005(0.002,0.008) * | 0.004(0.001,0.007) * | 0.004(0.001,0.007) * |
| OBS excluding Riboflavin | 0.006(0.003,0.009) * | 0.005(0.002,0.008) * | 0.005(0.002,0.008) * |
| OBS excluding Selenium | 0.006(0.003,0.009) * | 0.004(0.001,0.007) * | 0.005(0.002,0.008) * |
| OBS excluding Copper | 0.006(0.003,0.009) * | 0.005(0.002,0.008) * | 0.005(0.002,0.008) * |
| OBS excluding Zinc | 0.006(0.003,0.009) * | 0.005(0.002,0.008) * | 0.006(0.003,0.009) * |
| OBS excluding Magnesium | 0.006(0.003,0.009) * | 0.005(0.002,0.008) * | 0.005(0.002,0.008) * |
| OBS excluding Calcium | 0.006(0.003,0.009) * | 0.005(0.002,0.008) * | 0.005(0.002,0.008) * |
| OBS excluding Vitamin E | 0.006(0.003,0.009) * | 0.005(0.002,0.008) * | 0.005(0.002,0.008) * |
| OBS excluding Vitamin C | 0.006(0.003,0.009) * | 0.005(0.002,0.008) * | 0.006(0.003,0.009) * |
| OBS excluding Vitamin B12 | 0.006(0.003,0.009) * | 0.005(0.002,0.008) * | 0.006(0.003,0.009) * |
| OBS excluding Folate | 0.006(0.003,0.009) * | 0.005(0.002,0.008) * | 0.006(0.003,0.009) * |
| OBS excluding Vitamin B6 | 0.006(0.003,0.009) * | 0.005(0.002,0.008) * | 0.005(0.002,0.008) * |
| OBS excluding Niacin | 0.006(0.003,0.009) * | 0.004(0.001,0.007) * | 0.005(0.002,0.008) * |
| OBS excluding Carotene | 0.006(0.003,0.009) * | 0.005(0.002,0.008) * | 0.005(0.002,0.008) * |
| OBS excluding Fiber | 0.006(0.003,0.009) * | 0.005(0.002,0.008) * | 0.006(0.003,0.009) * |
| OBS excluding Alcohol | 0.006(0.003,0.009) * | 0.005(0.002,0.008) * | 0.006(0.003,0.009) * |
| OBS excluding Iron | 0.005(0.002,0.008) * | 0.004(0.001,0.007) * | 0.005(0.002,0.008) * |
| OBS excluding Cotinine | 0.006(0.003,0.009) * | 0.005(0.002,0.008) * | 0.006(0.003,0.009) * |
| OBS excluding BMI | 0.004(0.001,0.007) * | 0.005(0.002,0.008) * | 0.005(0.002,0.008) * |

*, P<0.05.

β,beta estimates;CI,confidence intervals;TT,total testosterone; FT,free testosterone;BAT:bioavailable testosterone;

All analyses were adjusted for race, education, poverty-income ratio,diabetes, hypertension, eGFR, and CVD.
